# Supplementary material for: Bacterial Nanocellulose Loaded with Bromelain: Assessment of Antimicrobial, Antioxidant and Physical-Chemical Properties
Source: PubMed Central journal article supplement (PMC5740125; doi:10.1038/s41598-017-18271-4), 2017-12-21
Supplement: 41598_2017_18271_MOESM1_ESM.pdf [file 41598_2017_18271_MOESM1_ESM.pdf]

## **Bacterial Nanocellulose Loaded with Bromelain: Assessment of Antimicrobial, Antioxidant and Physical-Chemical Properties**

Janaína Artem Ataide<sup>1</sup>, Nathália Mendes de Carvalho<sup>2</sup>, Marcia de Araujo Rebelo<sup>3</sup>, Marco Vinícius Chaud<sup>3</sup>, Denise Grotto<sup>2</sup>, Marli Gerenutti<sup>2</sup>, Mahendra Rai<sup>4</sup>, Priscila Gava Mazzola<sup>5</sup>, Angela Faustino Jozala<sup>2</sup>

<sup>1</sup>Graduate Program in Medical Sciences, Faculty of Medical Sciences, State University of Campinas, Campinas, Brazil

<sup>2</sup>Department of Technology & Environmental Process, University of Sorocaba UNISO, Sorocaba, SP – Brazil

<sup>3</sup>LaBNUS – Biomaterials and Nanotechnology Laboratory, i(bs)2 – intelligent biosensing and biomolecule stabilization research group, University of Sorocaba, Sorocaba/SP, Brazil

<sup>4</sup>Nanobiotechnology Lab., Department of Biotechnology, SGB Amravati University, Amravati, Maharashtra, India

<sup>5</sup>Faculty of Pharmaceutical Sciences, State University of Campinas, Campinas, Brazil

### **CORRESPONDING AUTHOR:**

**Janaína Artem Ataide** – Graduate Program in Medical Sciences, Faculty of Medical Sciences, University of Campinas (Unicamp), Campinas/SP, Brazil, zip code 13083-887

Phone Numbers: +55 19 99777 2620 / +55 19 3521 8884

E-mail Address: [janaina.a.ataide@gmail.com](mailto:janaina.a.ataide@gmail.com)

Postal Address: Faculty of Medical Sciences, University of Campinas (Unicamp) - Tessália Vieira de Camargo Street, 126, Cidade Universitária "Zeferino Vaz" - Campinas - SP - Brasil – zip code: 13083-887

## SUPPLEMENTARY INFORMATION

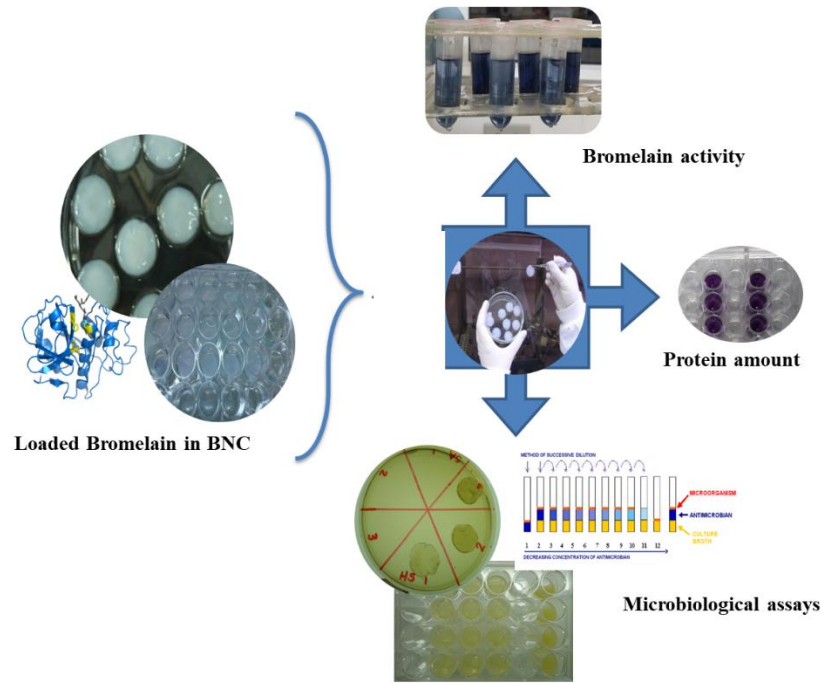

Supplementary Figure S1. Graphical scheme for general understanding of the manuscript.

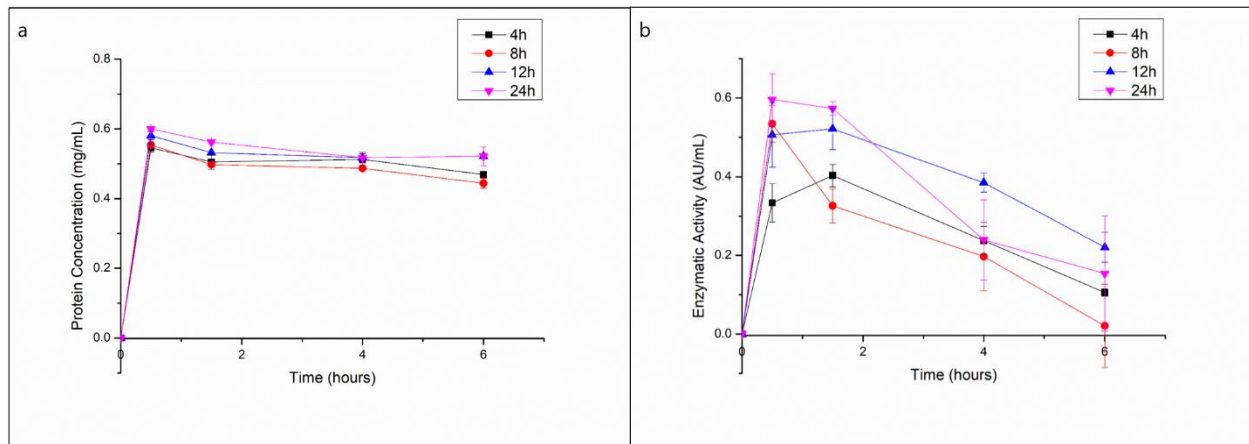

Supplementary Figure S2. Protein concentration (a) and enzymatic activity (b) of first 6 hours of bromelain release from bacterial cellulose membranes after different incorporation times at 25°C, where error bars correspond to standard deviation. Figure presenting time from 0 to 6 hours, enhancing the release in this time, once it is not so clear in figure 2 of main manuscript.
